# Supplementary material
Source: publisher site journal article supplement (https://www.dovepress.com/article/229935)
Supplement: Supplementary file 1 [file get_supplementary_file.php]

**Supplementary Table S1.** ECOG score.

| ECOG Performance Status |
| --- |
| 0: Fully active, able to carry on all pre-disease performance without restriction |
| 1: Restricted in physically strenuous activity but ambulatory and able to carry out work of light or sedentary nature, e.g. light house work, office work |
| 2: Ambulatory and capable of all self-care but unable to carry out any work activities. Up and about more than 50% of waking hours |
| 3: Capable of only limited self-care; confined to bed or chair more than 50% of waking hours |
| 4: Completely disabled. Cannot carry on any self-care. Totally confined to bed or chair |
| 5: Dead |

**Supplementary Table S2.** Comorbidities and their ICD-10 codes.

|  | **Comorbidity** |  | **ICD-10** |  |
| --- | --- | --- | --- | --- |
|  | Myocardial infarction |  | I21.x, I22.x, I25.2 |  |
|  | Congestive heart failure |  | I11.0, I13.0, I13.2, I25.5, I42.0, I42.5–I42.9, I43.x, I50.x, P29.0 |  |
|  | Peripheral vascular disease |  | I70.x, I71.x, I73.1, I73.8, I73.9, I77.1, I79.0, I79.2, K55.1, K55.8, K55.9, Z95.8, Z95.9 |  |
|  | Cerebrovascular disease |  | G45.x, G46.x, H34.0, I60.x–I69.x |  |
|  | Dementia |  | F00.x–F03.x, F05.1, G30.x, G31.1 |  |
|  | Chronic Obstructive Pulmonary Disease |  | I27.9, J40.x–J47.x, J60.x–J67.x, J68.4, J70.1, J70.3 |  |
|  | Rheumatic disease |  | M05.x, M06.x, M31.5, M32.x–M34.x, M35.1, M35.3, M36.0 |  |
|  | Mild liver disease |  | B18.x, K70.0–K70.3, K70.9, K71.3–K71.5, K71.7, K73.x, K74.x, K76.0, K76.2–K76.4, K76.8, K76.9, Z94.4 |  |
|  | Diabetes without chronic complication |  | E10.0, E10.1, E10.6, E10.8, E10.9, E11.0, E11.1, E11.6, E11.8, E11.9, E12.0, E12.1, E12.6, E12.8, E12.9, E13.0, E13.1, E13.6, E13.8, E13.9, E14.0, E14.1, E14.6, E14.8, E14.9 |  |
|  | Diabetes with chronic complication |  | E10.7, E11.2–E11.5, E11.7, E12.2–E12.5, E12.7, E13.2–E13.5, E13.7, E14.2–E14.5, E14.7 |  |
|  | Hemiplegia or paraplegia |  | G04.1, G11.4, G80.1, G80.2, G81.x, G82.x, G83.0–G83.4, G83.9 |  |
|  | Renal disease |  | I12.0, I13.1, N03.2–N03.7, N05.2–N05.7, N18.x, N19.x, N25.0, Z49.0–Z49.2, Z94.0, Z99.2 |  |
|  | Moderate or severe liver disease |  | I85.0, I85.9, I86.4, I98.2, K70.4, K71.1, K72.1, K72.9, K76.5, K76.6, K76.7 |  |
|  | AIDS/HIV |  | B20.x–B22.x, B24.x |  |

**Supplementary Table S3.** Prevalence of comorbidities ordered by frequency among all incident colorectal cancer patients in Granada and Girona, 2011, n = 1,061

|  | **Comorbidities Prevalence** | | | | | | | | | | | | |
| --- | --- | --- | --- | --- | --- | --- | --- | --- | --- | --- | --- | --- | --- |
|  | **Diabetes mellitus** | **COPD** | **Congestive**  **heart failure** | **Peripheral vascular disease** | **Rheumatic disease** | **Renal disease** | **Myocardial infarction** | **Cerebro-vascular**  **disease** | **Liver disease** | **Dementia** | **AIDS**  **/HIV** | **Hemiplegia/**  **paraplegia** |
|  | n(%) | n(%) | n(%) | n(%) | n(%) | n(%) | n(%) | n(%) | n(%) | n(%) | n(%) | n(%) |
| Yes | 250  (23.6) | 182  (17.2) | 154  (14.5) | 124  (11.7) | 104  (9.8) | 92  (8.7) | 67  (6.3) | 65  (6.1) | 56  (5.3) | 48  (4.5) | 4  (0.4) | 3  (0.3) |
| No | 790  (74.5) | 859  (81.0) | 887  (83.6) | 917  (86.4) | 937  (88.3) | 947  (89.3) | 974  (91.8) | 976  (92.0) | 985  (92.8) | 992  (93.5) | 1036  (97.6) | 1037  (97.7) |
| Unknown | 21  (2.0) | 20  (1.9) | 20  (1.9) | 20  (1.9) | 20  (1.9) | 22  (2.1) | 20  (1.9) | 20  (1.9) | 20  (1.9) | 21  (2.0) | 21  (2.0) | 21  (2.0) |
|  | | | | | | | | | | | | | |

**Supplementary Table S4.** Patient and tumor characteristics among colorectal cancer patients at diagnosis in Granada and Girona, 2011, n = 1,061

| **Patient's characteristics** | n(%) |  |  | **Tumor's characteristics** | n(%) |  | **Comorbidities/**  **Multimorbidity** | n(%) |
| --- | --- | --- | --- | --- | --- | --- | --- | --- |
| **Age in years** |  |  |  | **Anatomical subsite** |  |  | **Prevalence** |  |
| <55 | 130(12.3) |  |  | Right Colon | 357(33.6) |  | None | 413(38.9) |
| 55 - 64 | 219(20.6) |  |  | Left Colon | 340(32.1) |  | One | 301(28.4) |
| 65 - 74 | 272(25.6) |  |  | Colon Unspecified | 11(1.0) |  | Two | 190(17.9) |
| ≥75 | 440(41.5) |  |  | Rectal | 353(33.3) |  | Three | 89(8.4) |
| **Sex** |  |  |  | **Grade of differentiation** |  |  | Four | 30(2.8) |
| Male | 644(60.7) |  |  | One | 168(15.8) |  | Five | 11(1.0) |
| Female | 417(39.3) |  |  | Two | 596(56.2) |  | Six | 4(0.4) |
| **Performance status (ECOG)** |  |  |  | Three | 90(8.5) |  | Missing | 23(2.2) |
| Normal (0) | 259(24.4) |  |  | Four | 7(0.6) |  |  |  |
| Restricted but able to carry out light work (1) | 423(39.9) |  |  | Missing | 200(18.9) |  |  |  |
| Restricted, unable to work but capable of self-care (2) | 83(7.8) |  |  | **Stage TNM** |  |  |  |  |
| Restricted, capable of limited self-care (3) | 35(3.3) |  |  | I | 168(15.8) |  |  |  |
| Disabled (4) | 6(0.6) |  |  | II | 281(26.5) |  |  |  |
| Missing | 255(24.0) |  |  | III | 285(26.9) |  |  |  |
| **Smoking status** |  |  |  | IV | 267(25.2) |  |  |  |
| Current | 130(12.3) |  |  | Missing | 60(5.6) |  |  |  |
| Previous | 298(28.1) |  |  |  |  |  |  |  |
| Never | 505(47.6) |  |  |  |  |  |  |  |
| Missing | 127(12.0) |  |  |  |  |  |  |  |
| **BMI in kg/m2** |  |  |  |  |  |  |  |  |
| <25 | 226(21.3) |  |  |  |  |  |  |  |
| 25.0 - 29.9 | 327(30.8) |  |  |  |  |  |  |  |
| ≥30 | 193(18.2) |  |  |  |  |  |  |  |
| Missing | 315(29.7) |  |  |  |  |  |  |  |

**Supplementary Table S5.** Comorbidity prevalence in the overall Spanish population and colorectal cancer cases in Granada and Girona, 2011

|  |  | **Total** | **Congestive heart failure** | **Peripheral vascular disease** | **COPD** | **Rheumatic disease** | **Diabetes mellitus** |
| --- | --- | --- | --- | --- | --- | --- | --- |
| Spain overall population | <55 | 33,529,633 | 68,138 (0.2%) | 506,858 (1.5%) | 1,221,636 (3.6%) | 439,584 (1.3%) | 185,210 (0.6%) |
| 55-64 | 5,169,932 | 78,230 (1.5%) | 128,857 (2.5%) | 233,165 (4.5%) | 197,144 (3.8%) | 255,782 (4.9%) |
| 65-74 | 3,899,962 | 129,239 (3.3%) | 143,355 (3.7%) | 256,822 (6.6%) | 190,870 (4.9%) | 330,216 (8.5%) |
| >74 | 4,216,388 | 266,949 (6.3%) | 196,834 (4.7%) | 324,993 (7.7%) | 228,888 (5.4%) | 377,119 (8.9%) |
| Granada and Girona CRC cases | <55 | 130 | 4 (3.1%) | 9 (6.9%) | 8 (6.2%) | 6 (4.6%) | 6 (4.6%) |
| 55-64 | 219 | 17 (7.8%) | 22 (10%) | 21 (9.6%) | 13 (5.9%) | 42 (19.2%) |
| 65-74 | 272 | 34 (12.5%) | 36 (13.2%) | 57 (21%) | 30 (11%) | 86 (31.6%) |
| >74 | 440 | 99 (22.5%) | 57 (13%) | 96 (21.8%) | 55 (12.5%) | 116 (26.4%) |
